# Supplementary material for: Pulse-Cereal Blend Extrusion for Improving the Antioxidant Properties of a Gluten-Free Flour
Source: MDPI journal article supplement (doi:10.3390/molecules26185578), 2021-09-14
Supplement: s1 [file s1]

## Supplementary Materials

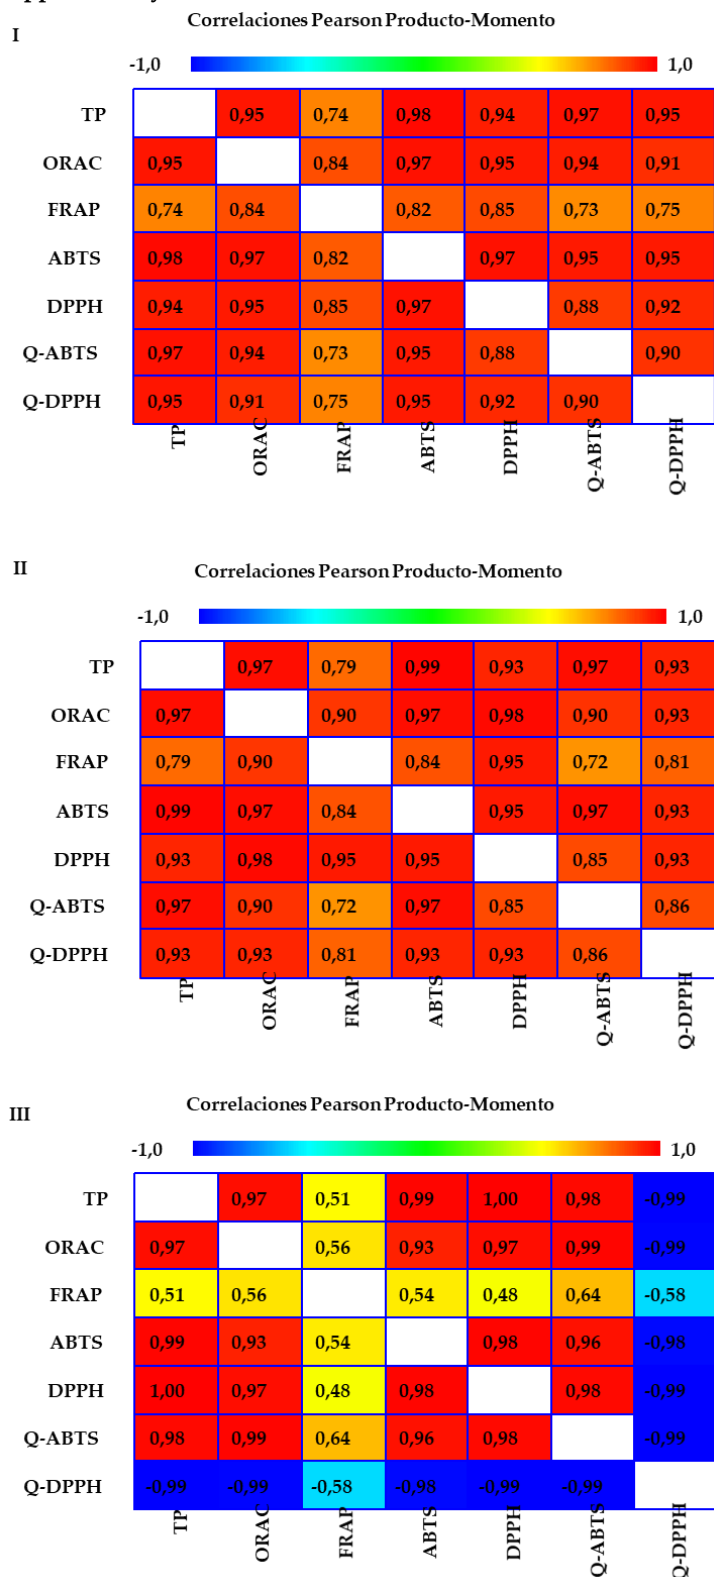

**Supplementary Figure S1.** Pearson's correlation analysis. (I) Data set of samples: native corn, rice and lentil flours, and extruded corn, rice, lentil (50%)-corn and lentil (50%)-rice flours. (II) Data set of samples: 130°C-extruded lentil (15%)-corn and lentil (50%)-corn flours. (III) Data set of samples: 130°C-extruded lentil (15%)-corn flour and baked product.

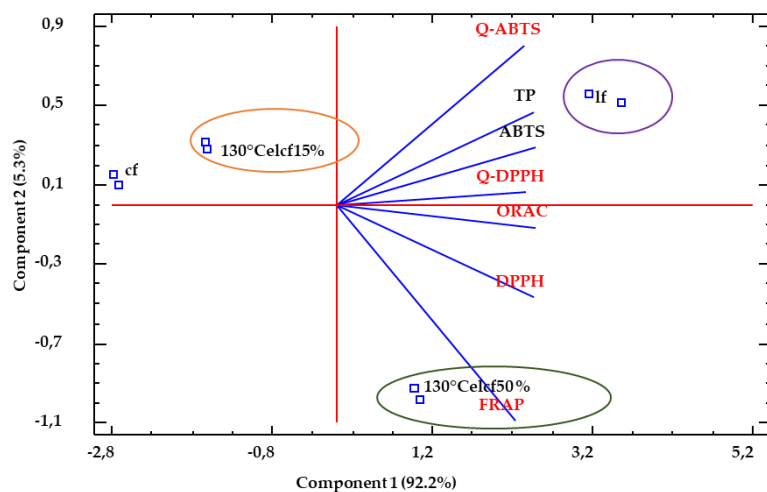

**Supplementary Figure S2.** PCA analysis for native and 130 °C-extruded flours. Abbreviations: cf: corn flour; lf: lentil flour; 130°Celcf15%: extruded lentil (15%)-corn flour; 130°Celcf50%: extruded lentil (50%)-corn flour.

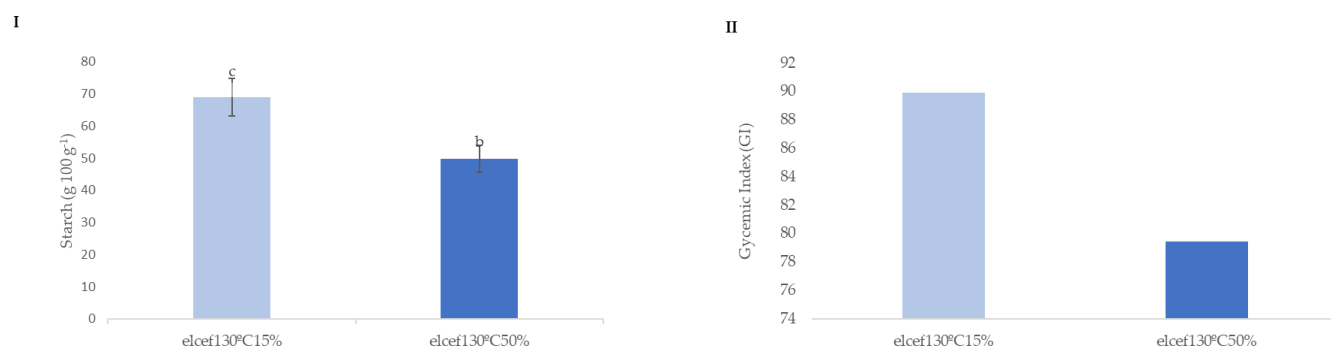

**Supplementary Figure S3.** Starch content (g 100g<sup>-1</sup> of dry matter) (I) and Glycemic index (GI) of 130 °C-extruded flours (II). Abbreviations: cf: corn flour; lf: lentil flour; 130°Celcf15%: extruded lentil (15%)-corn flour; 130°Celcf50%: extruded lentil (50%)-corn flour. Different small letters indicate significant differences ( $p \leq 0.05$ ) between samples.

**Supplementary Table S1.** RACI of native and extruded flours. Abbreviations: cf: corn flour; rf: rice flour; lf: lentil flour; ecf: extruded corn flour; erf: extruded rice flour; elcf: extruded lentil-corn flour; elrf: extruded lentil-rice flour.

| FLOURS       | RACI        |
|--------------|-------------|
| cf           | -0.56864807 |
| lf           | 2.43125276  |
| rf           | -0.8226027  |
| 110°Cecf     | -0.82883367 |
| 120°Cecf     | -0.79126188 |
| 130°Cecf     | -0.55167058 |
| 110°Cerf     | -0.85429132 |
| 120°Cerf     | -0.85760928 |
| 130°Cerf     | -0.6030281  |
| 110°Celcf50% | 0.15663327  |
| 120°Celcf50% | 0.04827246  |
| 130°Celcf50% | 1.25805807  |
| 110°Celrf50% | 0.00855723  |
| 120°Celrf50% | 0.08211183  |
| 130°Celrf50% | 1.0468099   |
| 130°Celcf15% | -0.61092303 |

**Supplementary Table S2.** Colorimetric parameters (CIE L\* a\* b\*, Hue and Chroma) of lentil (balanced with corn) flour extruded at 130°C.

| Sample       | L*                         | a*                       | b*                        | Hue                      | Chroma                    |
|--------------|----------------------------|--------------------------|---------------------------|--------------------------|---------------------------|
| 130°Celcf15% | 76.39 ± 5.27 <sup>b</sup>  | 3.52 ± 1.21 <sup>a</sup> | 21.97 ± 4.10 <sup>b</sup> | 1.42 ± 0.04 <sup>a</sup> | 22.25 ± 4.22 <sup>b</sup> |
| 130°Celcf50% | 46.30 ± 14.78 <sup>a</sup> | 2.38 ± 0.78 <sup>a</sup> | 14.66 ± 5.05 <sup>a</sup> | 1.41 ± 0.02 <sup>a</sup> | 14.86 ± 5.11 <sup>a</sup> |

\*Abbreviations: 130°Celcf15%: 15% lentil, 130°Celcf50%: 50% lentil. Different small letters in the same column indicate significant differences ( $p \leq 0.05$ ) between samples.
